# Supplementary material
Source: PubMed Central journal article supplement (PMC4238044)
Supplement: NIHMS636244-supplement-1.pdf [file NIHMS636244-supplement-1.pdf]

**Supplementary Figure 1:** QQ plots of the EoE discovery GWAS ( $\lambda 1.07$ ), replication GWAS ( $\lambda 1.04$ ), and meta-analysis ( $\lambda 1.001$ )

**EoE Discovery GWAS**

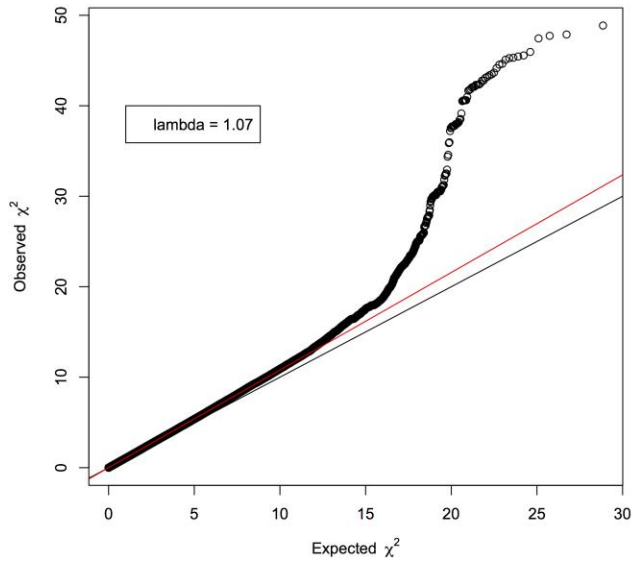

**EoE Replication GWAS**

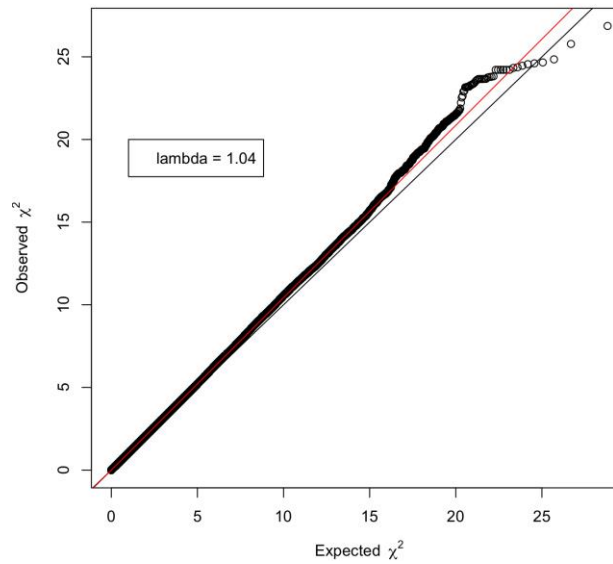

**EoE Meta-analysis QQ-plot**

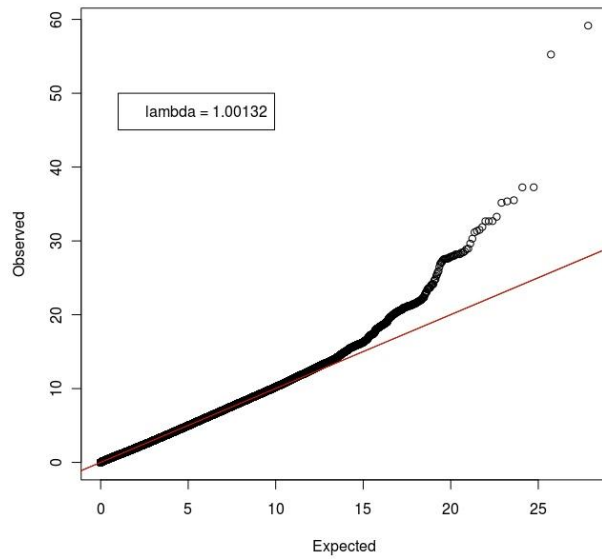

Supplementary Figure 2: Regional association plot at the TSLP locus on chr5q22.1

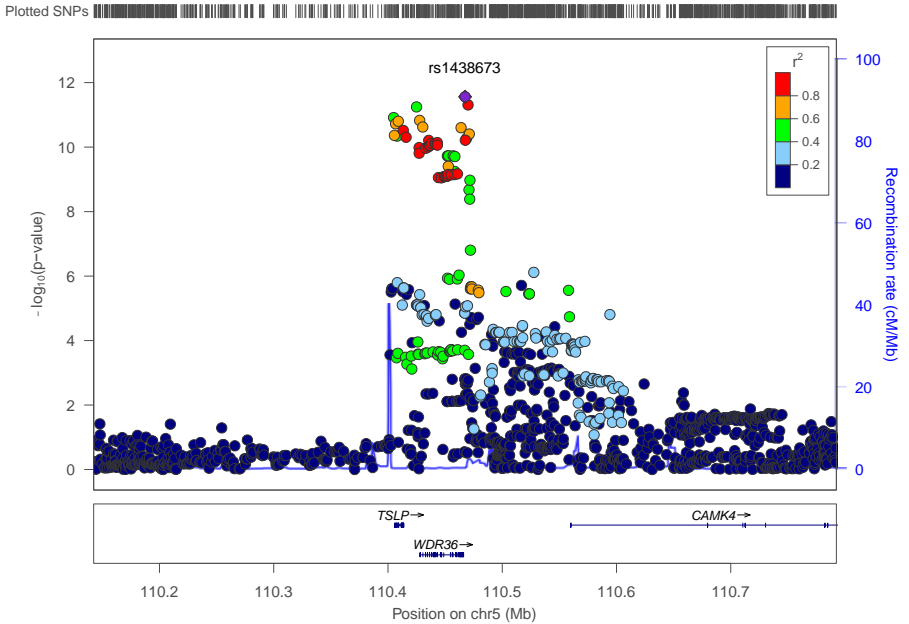

**Supplementary Figure 3: Regional association plot at the *c11orf30* locus.** Independent effects are clearly visible in the LD patterns of the associated variants. Panel A) SNPs in LD with rs55646091 and Panel B) SNPs in LD with rs11236791.

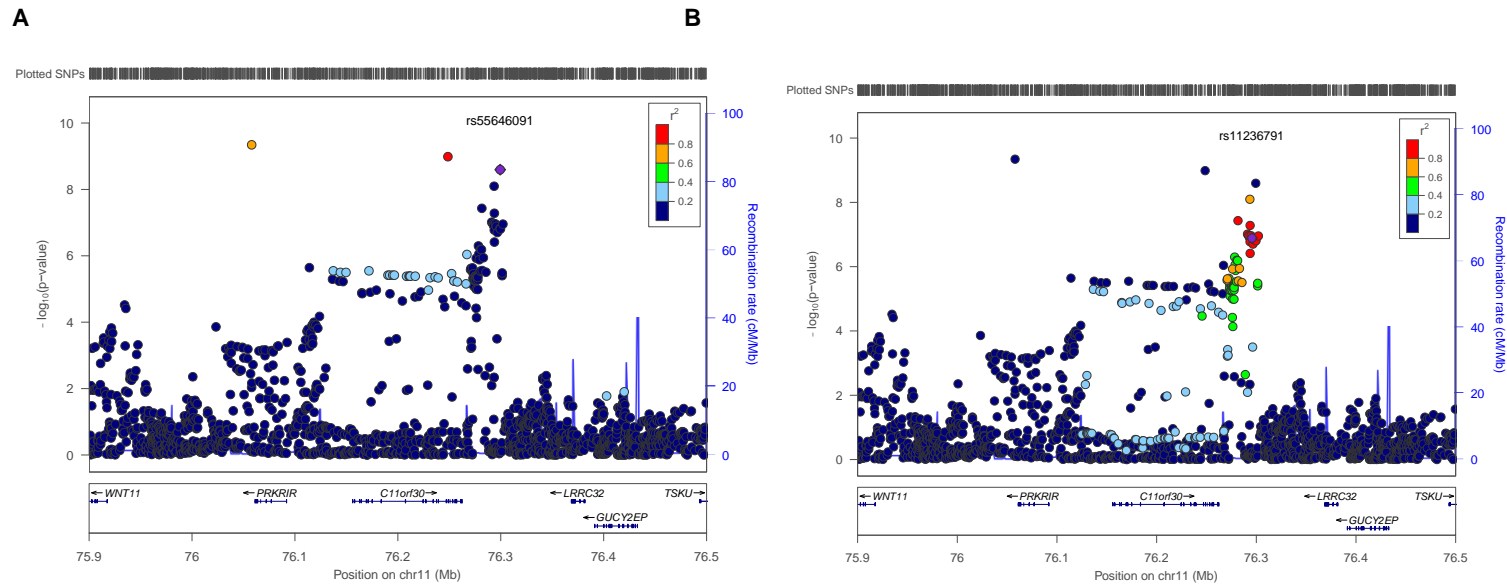

**Supplementary Figure 4: Regional association plot at the *CAPN14* locus on chr2p23.1**

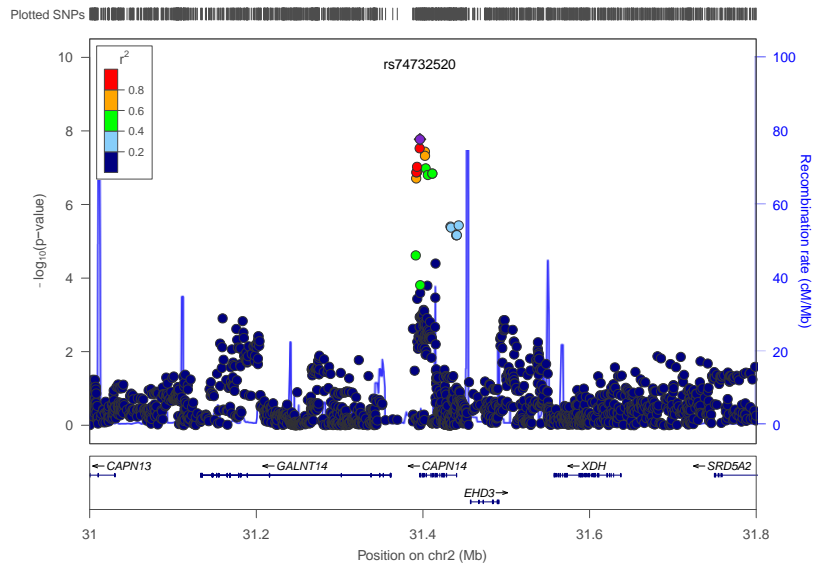

Supplementary Figure 5: Regional association plot at the STAT6 locus on chr12q13.3

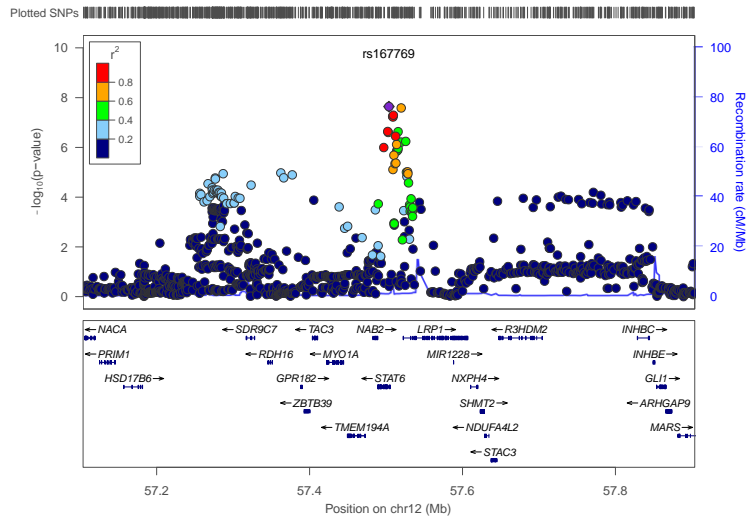

Supplementary Figure 6: Regional association plot at the ANKRD27 locus on chr19q13.11

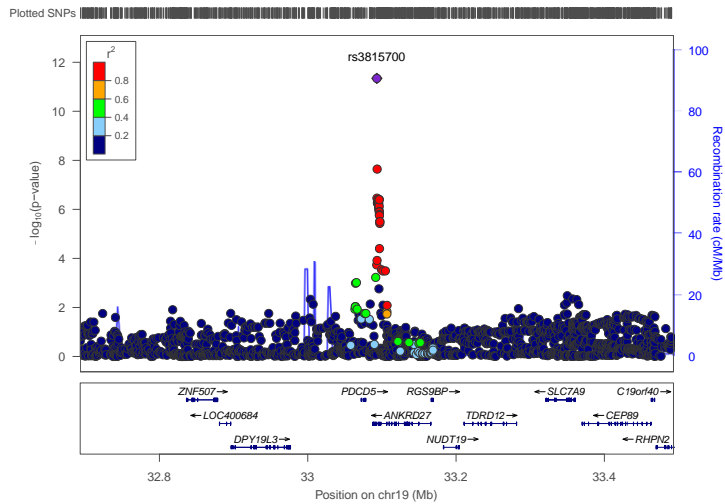

**Supplementary Table 1: Genome-wide significant variants: Discovery, replication and meta-analysis ORs and Pvals** *P* values for the discovery analysis are shown in bold if directly genotyped. *P* values for the discovery and replication sets were generated using a missing data likelihood score test as implemented in SNPTEST2. Cutoffs, genome-wide significance ( $P < 5 \times 10^{-8}$ ), MAF  $\geq 3\%$ , info scores  $\geq 0.8$ .  $P_{het}$ , heterogeneity *P* value for Cochran's *Q* statistic. OR, odds ratio.

| Variant [Effect Allele] | chr:pos hg19   | Gene   | Discovery            |       |                        |       | Replication          |       |                       |       | Meta  |       |                         |           |
|-------------------------|----------------|--------|----------------------|-------|------------------------|-------|----------------------|-------|-----------------------|-------|-------|-------|-------------------------|-----------|
|                         |                |        | effect allele<br>MAF | OR    | Pval                   | SE    | effect allele<br>MAF | OR    | Pval                  | SE    | OR    | SE    | Pval                    | $P_{het}$ |
| rs78464756[G]           | chr2:31396059  | CAPN14 | 0.067                | 1.767 | 2.96X10 <sup>-8</sup>  | 0.131 | 0.079                | 1.569 | 5.42X10 <sup>-3</sup> | 0.181 | 1.904 | 0.111 | 5.927X10 <sup>-9</sup>  | 0.333     |
| rs74732520[G]           | chr2:31396392  | CAPN14 | 0.067                | 1.782 | 1.69X10 <sup>-8</sup>  | 0.131 | 0.079                | 1.561 | 5.87X10 <sup>-3</sup> | 0.182 | 1.917 | 0.111 | 4.166X10 <sup>-9</sup>  | 0.301     |
| rs143457388[A]          | chr2:31402370  | CAPN14 | 0.052                | 1.858 | 3.66X10 <sup>-8</sup>  | 0.149 | 0.056                | 1.726 | 6.36X10 <sup>-4</sup> | 0.219 | 2.215 | 0.129 | 6.061X10 <sup>-10</sup> | 0.787     |
| rs149864795[A]          | chr2:31402407  | CAPN14 | 0.052                | 1.846 | 4.74X10 <sup>-8</sup>  | 0.149 | 0.057                | 1.759 | 4.41X10 <sup>-4</sup> | 0.218 | 2.216 | 0.128 | 5.245X10 <sup>-10</sup> | 0.861     |
| rs10455025[C]           | chr5:110404999 | TSLP   | 0.356                | 1.537 | 1.21X10 <sup>-11</sup> | 0.067 | 0.354                | 1.276 | 2.76X10 <sup>-3</sup> | 0.102 | 1.511 | 0.057 | 4.275X10 <sup>-13</sup> | 0.233     |
| <b>rs3806932[G]</b>     | chr5:110405675 | TSLP   | 0.444                | 0.630 | 4.31X10 <sup>-11</sup> | 0.064 | 0.437                | 0.720 | 7.00X10 <sup>-4</sup> | 0.100 | 0.671 | 0.055 | 2.706X10 <sup>-13</sup> | 0.502     |
| rs3806933[T]            | chr5:110406742 | TSLP   | 0.439                | 0.628 | 1.88X10 <sup>-11</sup> | 0.064 | 0.418                | 0.713 | 1.00X10 <sup>-3</sup> | 0.101 | 0.668 | 0.055 | 1.829X10 <sup>-13</sup> | 0.419     |
| rs1898671[T]            | chr5:110408002 | TSLP   | 0.350                | 1.514 | 4.54X10 <sup>-11</sup> | 0.068 | 0.348                | 1.255 | 5.01X10 <sup>-3</sup> | 0.104 | 1.499 | 0.058 | 2.826X10 <sup>-12</sup> | 0.213     |
| rs2289277[G]            | chr5:110409067 | TSLP   | 0.437                | 0.626 | 1.57X10 <sup>-11</sup> | 0.064 | 0.421                | 0.724 | 1.45X10 <sup>-3</sup> | 0.101 | 0.669 | 0.055 | 2.336X10 <sup>-13</sup> | 0.358     |
| rs10073816[A]           | chr5:110413489 | TSLP   | 0.442                | 0.628 | 3.03X10 <sup>-11</sup> | 0.064 | 0.434                | 0.719 | 6.70X10 <sup>-4</sup> | 0.101 | 0.668 | 0.055 | 1.873X10 <sup>-13</sup> | 0.488     |
| rs6594497[T]            | chr5:110415868 | TSLP   | 0.441                | 0.631 | 4.92X10 <sup>-11</sup> | 0.064 | 0.433                | 0.733 | 1.16X10 <sup>-3</sup> | 0.100 | 0.674 | 0.055 | 5.262X10 <sup>-13</sup> | 0.432     |
| rs252716[C]             | chr5:110425063 | TSLP   | 0.447                | 1.545 | 5.65X10 <sup>-12</sup> | 0.065 | 0.454                | 1.361 | 6.65X10 <sup>-4</sup> | 0.100 | 1.516 | 0.055 | 4.053X10 <sup>-14</sup> | 0.389     |
| rs10050834[T]           | chr5:110427328 | TSLP   | 0.452                | 0.639 | 1.03X10 <sup>-10</sup> | 0.064 | 0.437                | 0.749 | 1.59X10 <sup>-3</sup> | 0.101 | 0.680 | 0.054 | 1.418X10 <sup>-12</sup> | 0.448     |
| <b>rs7723819[A]</b>     | chr5:110427347 | TSLP   | 0.453                | 0.641 | 1.54X10 <sup>-10</sup> | 0.064 | 0.441                | 0.739 | 1.05X10 <sup>-3</sup> | 0.101 | 0.680 | 0.054 | 1.341X10 <sup>-12</sup> | 0.524     |
| rs79881201[T]           | chr5:110427795 | TSLP   | 0.362                | 1.536 | 1.48X10 <sup>-11</sup> | 0.067 | 0.367                | 1.250 | 5.45X10 <sup>-3</sup> | 0.102 | 1.495 | 0.057 | 1.123X10 <sup>-12</sup> | 0.184     |
| rs17623144[G]           | chr5:110430488 | TSLP   | 0.360                | 1.532 | 2.37X10 <sup>-11</sup> | 0.067 | 0.361                | 1.261 | 3.35X10 <sup>-3</sup> | 0.103 | 1.498 | 0.057 | 9.369X10 <sup>-13</sup> | 0.248     |
| rs1993465[G]            | chr5:110433098 | TSLP   | 0.456                | 0.640 | 1.08X10 <sup>-10</sup> | 0.064 | 0.444                | 0.748 | 1.42X10 <sup>-3</sup> | 0.101 | 0.679 | 0.055 | 1.318X10 <sup>-12</sup> | 0.462     |
| rs6859041[A]            | chr5:110435231 | TSLP   | 0.455                | 0.639 | 9.85X10 <sup>-11</sup> | 0.064 | 0.444                | 0.744 | 1.39X10 <sup>-3</sup> | 0.101 | 0.679 | 0.055 | 1.186X10 <sup>-12</sup> | 0.457     |
| rs1379298[C]            | chr5:110435726 | TSLP   | 0.455                | 0.639 | 6.16X10 <sup>-11</sup> | 0.064 | 0.444                | 0.752 | 1.79X10 <sup>-3</sup> | 0.101 | 0.677 | 0.055 | 1.005X10 <sup>-12</sup> | 0.405     |
| rs10038177[T]           | chr5:110436450 | TSLP   | 0.457                | 0.638 | 9.00X10 <sup>-11</sup> | 0.064 | 0.445                | 0.755 | 2.19X10 <sup>-3</sup> | 0.100 | 0.681 | 0.054 | 1.785X10 <sup>-12</sup> | 0.389     |
| rs6865932[C]            | chr5:110436852 | TSLP   | 0.457                | 0.638 | 8.79X10 <sup>-11</sup> | 0.064 | 0.445                | 0.752 | 1.90X10 <sup>-3</sup> | 0.100 | 0.680 | 0.054 | 1.501X10 <sup>-12</sup> | 0.405     |
| chr5:110437826:I[TA]    | chr5:110437826 | TSLP   | 0.361                | 1.539 | 1.72X10 <sup>-11</sup> | 0.066 | 0.365                | 1.256 | 5.71X10 <sup>-3</sup> | 0.102 | 1.492 | 0.056 | 1.329X10 <sup>-12</sup> | 0.189     |
| chr5:110437828:I[AT]    | chr5:110437828 | TSLP   | 0.361                | 1.539 | 1.68X10 <sup>-11</sup> | 0.067 | 0.364                | 1.248 | 5.68X10 <sup>-3</sup> | 0.102 | 1.493 | 0.057 | 1.297X10 <sup>-12</sup> | 0.188     |
| rs10045255[G]           | chr5:110438357 | TSLP   | 0.458                | 0.637 | 7.68X10 <sup>-11</sup> | 0.064 | 0.446                | 0.765 | 3.13X10 <sup>-3</sup> | 0.100 | 0.683 | 0.054 | 2.297X10 <sup>-12</sup> | 0.335     |
| rs1379300[C]            | chr5:110441439 | TSLP   | 0.457                | 0.638 | 7.81X10 <sup>-11</sup> | 0.064 | 0.444                | 0.741 | 1.41X10 <sup>-3</sup> | 0.100 | 0.678 | 0.054 | 9.752X10 <sup>-13</sup> | 0.440     |
| rs2034896[A]            | chr5:110441533 | TSLP   | 0.457                | 0.638 | 7.79X10 <sup>-11</sup> | 0.064 | 0.444                | 0.741 | 1.41X10 <sup>-3</sup> | 0.100 | 0.678 | 0.054 | 9.755X10 <sup>-13</sup> | 0.439     |
| rs10043631[T]           | chr5:110443228 | TSLP   | 0.457                | 0.637 | 7.24X10 <sup>-11</sup> | 0.064 | 0.445                | 0.745 | 1.77X10 <sup>-3</sup> | 0.100 | 0.679 | 0.054 | 1.166X10 <sup>-12</sup> | 0.406     |
| rs10038058[G]           | chr5:110443281 | TSLP   | 0.456                | 0.639 | 8.63X10 <sup>-11</sup> | 0.064 | 0.445                | 0.745 | 1.77X10 <sup>-3</sup> | 0.100 | 0.680 | 0.054 | 1.372X10 <sup>-12</sup> | 0.413     |

|                      |                |          |       |       |                        |       |       |       |                       |       |       |       |                         |       |
|----------------------|----------------|----------|-------|-------|------------------------|-------|-------|-------|-----------------------|-------|-------|-------|-------------------------|-------|
| rs13178997[T]        | chr5:110444249 | TSLP     | 0.441 | 0.654 | 8.80X10 <sup>-10</sup> | 0.064 | 0.435 | 0.710 | 2.96X10 <sup>-4</sup> | 0.100 | 0.681 | 0.055 | 2.003X10 <sup>-12</sup> | 0.815 |
| rs13161853[A]        | chr5:110446741 | TSLP     | 0.441 | 0.654 | 8.96X10 <sup>-10</sup> | 0.064 | 0.432 | 0.709 | 2.88X10 <sup>-4</sup> | 0.100 | 0.681 | 0.055 | 1.987X10 <sup>-12</sup> | 0.823 |
| chr5:110449140:[CT]  | chr5:110449140 | TSLP     | 0.439 | 0.654 | 6.46X10 <sup>-10</sup> | 0.064 | 0.437 | 0.716 | 3.49X10 <sup>-4</sup> | 0.101 | 0.679 | 0.055 | 1.745X10 <sup>-12</sup> | 0.764 |
| rs2112541[C]         | chr5:110449346 | TSLP     | 0.441 | 0.653 | 8.17X10 <sup>-10</sup> | 0.064 | 0.437 | 0.726 | 6.11X10 <sup>-4</sup> | 0.100 | 0.684 | 0.055 | 3.757X10 <sup>-12</sup> | 0.692 |
| rs10060003[G]        | chr5:110449357 | TSLP     | 0.441 | 0.653 | 8.17X10 <sup>-10</sup> | 0.064 | 0.437 | 0.726 | 6.11X10 <sup>-4</sup> | 0.100 | 0.684 | 0.055 | 3.757X10 <sup>-12</sup> | 0.692 |
| rs10055177[G]        | chr5:110450584 | TSLP     | 0.441 | 0.653 | 8.07X10 <sup>-10</sup> | 0.064 | 0.437 | 0.724 | 5.91X10 <sup>-4</sup> | 0.100 | 0.684 | 0.055 | 3.6X10 <sup>-12</sup>   | 0.694 |
| rs6880351[G]         | chr5:110451664 | TSLP     | 0.441 | 0.653 | 8.00X10 <sup>-10</sup> | 0.064 | 0.436 | 0.731 | 8.92X10 <sup>-4</sup> | 0.100 | 0.686 | 0.055 | 5.367X10 <sup>-12</sup> | 0.629 |
| rs6881147[C]         | chr5:110451936 | TSLP     | 0.441 | 0.653 | 7.82X10 <sup>-10</sup> | 0.064 | 0.436 | 0.728 | 6.60X10 <sup>-4</sup> | 0.100 | 0.685 | 0.055 | 3.888X10 <sup>-12</sup> | 0.676 |
| rs6884870[G]         | chr5:110452084 | TSLP     | 0.350 | 1.501 | 1.88X10 <sup>-10</sup> | 0.068 | 0.352 | 1.218 | 0.013                 | 0.105 | 1.468 | 0.058 | 2.988X10 <sup>-11</sup> | 0.176 |
| rs10059658[C]        | chr5:110452815 | TSLP     | 0.438 | 0.649 | 3.92X10 <sup>-10</sup> | 0.064 | 0.435 | 0.726 | 5.39X10 <sup>-4</sup> | 0.100 | 0.679 | 0.055 | 1.663X10 <sup>-12</sup> | 0.658 |
| <b>rs10051830[A]</b> | chr5:110452845 | TSLP     | 0.441 | 0.653 | 7.02X10 <sup>-10</sup> | 0.064 | 0.435 | 0.722 | 4.54X10 <sup>-4</sup> | 0.100 | 0.682 | 0.055 | 2.433X10 <sup>-12</sup> | 0.727 |
| rs77793850[A]        | chr5:110452944 | TSLP     | 0.350 | 1.502 | 1.88X10 <sup>-10</sup> | 0.068 | 0.350 | 1.219 | 0.011                 | 0.105 | 1.470 | 0.058 | 2.471X10 <sup>-11</sup> | 0.191 |
| rs17624321[G]        | chr5:110453076 | TSLP     | 0.350 | 1.502 | 1.85X10 <sup>-10</sup> | 0.068 | 0.352 | 1.218 | 0.012                 | 0.105 | 1.469 | 0.058 | 2.701X10 <sup>-11</sup> | 0.184 |
| rs7732974[C]         | chr5:110455381 | TSLP     | 0.441 | 0.653 | 7.21X10 <sup>-10</sup> | 0.064 | 0.435 | 0.725 | 5.28X10 <sup>-4</sup> | 0.100 | 0.683 | 0.055 | 2.888X10 <sup>-12</sup> | 0.707 |
| rs17624673[T]        | chr5:110457158 | TSLP     | 0.350 | 1.503 | 1.86X10 <sup>-10</sup> | 0.068 | 0.352 | 1.218 | 0.012                 | 0.105 | 1.469 | 0.058 | 2.715X10 <sup>-11</sup> | 0.184 |
| rs6594498[A]         | chr5:110458351 | TSLP     | 0.441 | 0.653 | 7.08X10 <sup>-10</sup> | 0.064 | 0.432 | 0.716 | 3.32X10 <sup>-4</sup> | 0.101 | 0.680 | 0.055 | 1.812X10 <sup>-12</sup> | 0.783 |
| rs6889889[A]         | chr5:110458416 | TSLP     | 0.352 | 1.490 | 5.67X10 <sup>-10</sup> | 0.068 | 0.353 | 1.233 | 8.64X10 <sup>-3</sup> | 0.105 | 1.461 | 0.058 | 4.798X10 <sup>-11</sup> | 0.257 |
| rs113295611[G]       | chr5:110458605 | TSLP     | 0.350 | 1.502 | 1.95X10 <sup>-10</sup> | 0.068 | 0.352 | 1.217 | 0.013                 | 0.105 | 1.467 | 0.058 | 3.134X10 <sup>-11</sup> | 0.176 |
| rs7702774[T]         | chr5:110460851 | TSLP     | 0.441 | 0.652 | 6.75X10 <sup>-10</sup> | 0.064 | 0.434 | 0.715 | 3.33X10 <sup>-4</sup> | 0.101 | 0.680 | 0.055 | 1.735X10 <sup>-12</sup> | 0.781 |
| <b>rs1043828[C]</b>  | chr5:110464008 | TSLP     | 0.360 | 1.540 | 2.49X10 <sup>-11</sup> | 0.066 | 0.366 | 1.225 | 9.72X10 <sup>-3</sup> | 0.102 | 1.478 | 0.056 | 3.461X10 <sup>-12</sup> | 0.159 |
| rs1438673[T]         | chr5:110467499 | TSLP     | 0.496 | 0.626 | 2.74X10 <sup>-12</sup> | 0.063 | 0.490 | 0.793 | 3.84X10 <sup>-3</sup> | 0.099 | 0.671 | 0.054 | 1.507X10 <sup>-13</sup> | 0.193 |
| rs1438672[A]         | chr5:110467753 | TSLP     | 0.457 | 0.638 | 6.08X10 <sup>-11</sup> | 0.064 | 0.441 | 0.780 | 8.36X10 <sup>-3</sup> | 0.100 | 0.687 | 0.055 | 6.019X10 <sup>-12</sup> | 0.206 |
| rs34962275[G]        | chr5:110468977 | TSLP     | 0.363 | 1.528 | 5.24X10 <sup>-11</sup> | 0.066 | 0.368 | 1.241 | 8.52X10 <sup>-3</sup> | 0.102 | 1.472 | 0.056 | 5.738X10 <sup>-12</sup> | 0.185 |
| rs6594499[A]         | chr5:110470137 | TSLP     | 0.493 | 0.633 | 4.89X10 <sup>-12</sup> | 0.064 | 0.483 | 0.779 | 2.48X10 <sup>-3</sup> | 0.100 | 0.669 | 0.055 | 1.47X10 <sup>-13</sup>  | 0.259 |
| rs6594500[A]         | chr5:110470994 | TSLP     | 0.395 | 1.466 | 2.11X10 <sup>-9</sup>  | 0.066 | 0.410 | 1.164 | 0.092                 | 0.102 | 1.392 | 0.056 | 3.399X10 <sup>-9</sup>  | 0.072 |
| rs12186767[G]        | chr5:110471218 | TSLP     | 0.358 | 1.525 | 3.90X10 <sup>-11</sup> | 0.067 | 0.358 | 1.211 | 0.015                 | 0.105 | 1.475 | 0.057 | 8.541X10 <sup>-12</sup> | 0.141 |
| rs72784258[C]        | chr5:110471615 | TSLP     | 0.391 | 1.454 | 4.10X10 <sup>-9</sup>  | 0.066 | 0.404 | 1.197 | 0.048                 | 0.104 | 1.402 | 0.057 | 2.203X10 <sup>-9</sup>  | 0.143 |
| rs73786772[G]        | chr5:110471791 | TSLP     | 0.326 | 1.455 | 1.06X10 <sup>-9</sup>  | 0.070 | 0.343 | 1.257 | 5.11X10 <sup>-3</sup> | 0.106 | 1.478 | 0.059 | 5.004X10 <sup>-11</sup> | 0.306 |
| rs55684690[T]        | chr11:76057946 | c11orf30 | 0.038 | 2.109 | 4.20X10 <sup>-8</sup>  | 0.169 | 0.040 | 2.132 | 6.81X10 <sup>-5</sup> | 0.270 | 2.637 | 0.149 | 6.961X10 <sup>-11</sup> | 0.652 |
| chr11:76114003:D[T]  | chr11:76114003 | c11orf30 | 0.162 | 1.637 | 4.56X10 <sup>-9</sup>  | 0.086 | 0.177 | 1.352 | 9.26X10 <sup>-3</sup> | 0.133 | 1.578 | 0.075 | 1.007X10 <sup>-9</sup>  | 0.344 |
| rs12420744[G]        | chr11:76114021 | c11orf30 | 0.159 | 1.620 | 1.27X10 <sup>-8</sup>  | 0.087 | 0.171 | 1.372 | 5.14X10 <sup>-3</sup> | 0.137 | 1.585 | 0.076 | 1.232X10 <sup>-9</sup>  | 0.509 |
| rs1893870[T]         | chr11:76117879 | c11orf30 | 0.257 | 1.451 | 4.34X10 <sup>-8</sup>  | 0.073 | 0.272 | 1.171 | 0.131                 | 0.115 | 1.397 | 0.064 | 1.699X10 <sup>-7</sup>  | 0.108 |
| rs7927830[A]         | chr11:76120315 | c11orf30 | 0.241 | 1.493 | 2.47X10 <sup>-8</sup>  | 0.074 | 0.259 | 1.126 | 0.240                 | 0.114 | 1.392 | 0.065 | 3.175X10 <sup>-7</sup>  | 0.046 |
| rs2156708[C]         | chr11:76122213 | c11orf30 | 0.241 | 1.493 | 2.50X10 <sup>-8</sup>  | 0.075 | 0.260 | 1.127 | 0.236                 | 0.114 | 1.392 | 0.065 | 3.117X10 <sup>-7</sup>  | 0.047 |

|                     |                |          |       |       |                        |       |       |       |                       |       |       |       |                         |       |
|---------------------|----------------|----------|-------|-------|------------------------|-------|-------|-------|-----------------------|-------|-------|-------|-------------------------|-------|
| rs871911[G]         | chr11:76123849 | c11orf30 | 0.235 | 1.504 | 9.49X10 <sup>-9</sup>  | 0.076 | 0.261 | 1.125 | 0.242                 | 0.114 | 1.408 | 0.065 | 1.73x10 <sup>-7</sup>   | 0.034 |
| rs59382353[A]       | chr11:76137243 | c11orf30 | 0.156 | 1.637 | 1.18X10 <sup>-8</sup>  | 0.086 | 0.168 | 1.393 | 4.82X10 <sup>-3</sup> | 0.136 | 1.586 | 0.076 | 1.085X10 <sup>-9</sup>  | 0.514 |
| rs73004436[G]       | chr11:76144139 | c11orf30 | 0.155 | 1.636 | 1.19X10 <sup>-8</sup>  | 0.087 | 0.167 | 1.384 | 5.38X10 <sup>-3</sup> | 0.136 | 1.585 | 0.076 | 1.225X10 <sup>-9</sup>  | 0.495 |
| rs4426156[G]        | chr11:76149594 | c11orf30 | 0.156 | 1.634 | 1.35X10 <sup>-8</sup>  | 0.087 | 0.167 | 1.384 | 5.36X10 <sup>-3</sup> | 0.136 | 1.583 | 0.076 | 1.361X10 <sup>-9</sup>  | 0.503 |
| rs61894509[C]       | chr11:76171935 | c11orf30 | 0.157 | 1.622 | 3.05X10 <sup>-8</sup>  | 0.086 | 0.167 | 1.368 | 7.57X10 <sup>-3</sup> | 0.136 | 1.560 | 0.076 | 3.938X10 <sup>-9</sup>  | 0.495 |
| rs61696910[G]       | chr11:76190383 | c11orf30 | 0.155 | 1.622 | 3.27X10 <sup>-8</sup>  | 0.086 | 0.167 | 1.364 | 8.14X10 <sup>-3</sup> | 0.136 | 1.558 | 0.076 | 4.531X10 <sup>-9</sup>  | 0.484 |
| rs61894530[A]       | chr11:76192036 | c11orf30 | 0.155 | 1.622 | 3.27X10 <sup>-8</sup>  | 0.086 | 0.167 | 1.364 | 8.14X10 <sup>-3</sup> | 0.136 | 1.558 | 0.076 | 4.531X10 <sup>-9</sup>  | 0.484 |
| rs11532107[T]       | chr11:76194993 | c11orf30 | 0.155 | 1.622 | 3.27X10 <sup>-8</sup>  | 0.086 | 0.167 | 1.364 | 8.14X10 <sup>-3</sup> | 0.136 | 1.558 | 0.076 | 4.531X10 <sup>-9</sup>  | 0.484 |
| rs142931944[G]      | chr11:76196566 | c11orf30 | 0.155 | 1.622 | 3.27X10 <sup>-8</sup>  | 0.086 | 0.167 | 1.364 | 8.14X10 <sup>-3</sup> | 0.136 | 1.558 | 0.076 | 4.528X10 <sup>-9</sup>  | 0.484 |
| rs11236766[A]       | chr11:76208451 | c11orf30 | 0.155 | 1.618 | 4.07X10 <sup>-8</sup>  | 0.086 | 0.166 | 1.373 | 6.89X10 <sup>-3</sup> | 0.137 | 1.558 | 0.076 | 4.564X10 <sup>-9</sup>  | 0.532 |
| rs61894534[T]       | chr11:76210929 | c11orf30 | 0.155 | 1.618 | 4.06X10 <sup>-8</sup>  | 0.086 | 0.166 | 1.373 | 6.90X10 <sup>-3</sup> | 0.137 | 1.558 | 0.076 | 4.554X10 <sup>-9</sup>  | 0.532 |
| rs11236767[A]       | chr11:76211421 | c11orf30 | 0.155 | 1.618 | 4.06X10 <sup>-8</sup>  | 0.086 | 0.166 | 1.373 | 6.90X10 <sup>-3</sup> | 0.137 | 1.558 | 0.076 | 4.557X10 <sup>-9</sup>  | 0.532 |
| rs57790584[C]       | chr11:76212164 | c11orf30 | 0.155 | 1.618 | 4.06X10 <sup>-8</sup>  | 0.086 | 0.166 | 1.373 | 6.90X10 <sup>-3</sup> | 0.137 | 1.558 | 0.076 | 4.557X10 <sup>-9</sup>  | 0.532 |
| rs7940373[T]        | chr11:76216873 | c11orf30 | 0.155 | 1.618 | 4.07X10 <sup>-8</sup>  | 0.086 | 0.166 | 1.373 | 6.87X10 <sup>-3</sup> | 0.137 | 1.558 | 0.076 | 4.542X10 <sup>-9</sup>  | 0.532 |
| rs61894541[G]       | chr11:76231227 | c11orf30 | 0.156 | 1.616 | 4.35X10 <sup>-8</sup>  | 0.086 | 0.167 | 1.351 | 9.13X10 <sup>-3</sup> | 0.136 | 1.550 | 0.076 | 6.522X10 <sup>-9</sup>  | 0.481 |
| <b>rs1939469[G]</b> | chr11:76236220 | c11orf30 | 0.156 | 1.617 | 3.98X10 <sup>-8</sup>  | 0.086 | 0.167 | 1.360 | 8.38X10 <sup>-3</sup> | 0.136 | 1.553 | 0.075 | 5.512X10 <sup>-9</sup>  | 0.492 |
| rs11236775[A]       | chr11:76239148 | c11orf30 | 0.156 | 1.615 | 4.93X10 <sup>-8</sup>  | 0.086 | 0.166 | 1.362 | 6.90X10 <sup>-3</sup> | 0.137 | 1.556 | 0.076 | 5.354X10 <sup>-9</sup>  | 0.550 |
| rs61894547[T]       | chr11:76248630 | c11orf30 | 0.043 | 2.210 | 2.01X10 <sup>-9</sup>  | 0.155 | 0.048 | 1.818 | 7.49X10 <sup>-4</sup> | 0.238 | 2.439 | 0.135 | 3.643X10 <sup>-11</sup> | 0.661 |
| chr11:76251777:D[T] | chr11:76251777 | c11orf30 | 0.156 | 1.617 | 3.41X10 <sup>-8</sup>  | 0.086 | 0.166 | 1.350 | 8.05X10 <sup>-3</sup> | 0.137 | 1.560 | 0.076 | 4.585X10 <sup>-9</sup>  | 0.499 |
| rs3758716[T]        | chr11:76254529 | c11orf30 | 0.156 | 1.617 | 3.33X10 <sup>-8</sup>  | 0.086 | 0.166 | 1.349 | 8.24X10 <sup>-3</sup> | 0.137 | 1.560 | 0.076 | 4.604X10 <sup>-9</sup>  | 0.493 |
| rs3758715[T]        | chr11:76254539 | c11orf30 | 0.156 | 1.617 | 3.33X10 <sup>-8</sup>  | 0.086 | 0.166 | 1.349 | 8.24X10 <sup>-3</sup> | 0.137 | 1.560 | 0.076 | 4.608X10 <sup>-9</sup>  | 0.493 |
| rs17134961[C]       | chr11:76257759 | c11orf30 | 0.156 | 1.611 | 3.49X10 <sup>-8</sup>  | 0.087 | 0.166 | 1.343 | 9.62X10 <sup>-3</sup> | 0.136 | 1.556 | 0.076 | 5.746X10 <sup>-9</sup>  | 0.456 |
| rs2155221[T]        | chr11:76266267 | c11orf30 | 0.156 | 1.604 | 4.44X10 <sup>-8</sup>  | 0.087 | 0.166 | 1.338 | 0.010                 | 0.137 | 1.552 | 0.076 | 7.621X10 <sup>-9</sup>  | 0.461 |
| rs55646091[A]       | chr11:76299431 | c11orf30 | 0.044 | 2.219 | 5.38X10 <sup>-10</sup> | 0.157 | 0.050 | 1.584 | 4.33X10 <sup>-3</sup> | 0.237 | 2.414 | 0.135 | 7.672X10 <sup>-11</sup> | 0.315 |
| <b>rs167769[T]</b>  | chr12:57503775 | STAT6    | 0.377 | 1.498 | 2.29X10 <sup>-8</sup>  | 0.066 | 0.367 | 1.123 | 0.209                 | 0.105 | 1.351 | 0.058 | 2.199X10 <sup>-7</sup>  | 0.064 |
| rs73120411[T]       | chr12:57519826 | STAT6    | 0.345 | 1.475 | 2.59X10 <sup>-8</sup>  | 0.069 | 0.341 | 1.080 | 0.245                 | 0.111 | 1.368 | 0.061 | 3.089X10 <sup>-7</sup>  | 0.056 |
| <b>rs3815700[C]</b> | chr19:33093252 | ANKRD27  | 0.140 | 1.653 | 4.54X10 <sup>-12</sup> | 0.092 | 0.144 | 1.098 | 0.413                 | 0.144 | 1.618 | 0.081 | 2.366X10 <sup>-9</sup>  | 0.003 |
| rs10410895[G]       | chr19:33093655 | ANKRD27  | 0.140 | 1.474 | 2.27X10 <sup>-8</sup>  | 0.096 | 0.148 | 1.066 | 0.522                 | 0.144 | 1.485 | 0.083 | 1.847x10 <sup>-6</sup>  | 0.012 |
| rs8008716[G]        | chr14:27125765 | NOVA1    | 0.087 | 1.455 | 2.07x10 <sup>-6</sup>  | 0.117 | 0.092 | 1.579 | 0.002                 | 0.164 | 1.712 | 0.100 | 6.93x10 <sup>-8</sup>   | 0.793 |

**Supplementary Table 2: Conditional analyses at the c11orf30 and STAT6 loci on EoE comorbidity status.** *P* values were generated using a missing data likelihood score test as implemented in SNPTEST2 with and without conditioning on comorbidities.

| Variant [Effect Allele] | chr:pos hg19   | Gene     | effect allele<br>MAF | Not conditioning on comorbidities |                       |       | Conditional analysis |                       |       |
|-------------------------|----------------|----------|----------------------|-----------------------------------|-----------------------|-------|----------------------|-----------------------|-------|
|                         |                |          |                      | OR                                | Pval                  | SE    | OR                   | Pval                  | SE    |
| rs55684690[T]           | chr11:76057946 | c11orf30 | 0.038                | 2.305                             | 4.85x10 <sup>-6</sup> | 0.250 | 2.128                | 1.88x10 <sup>-4</sup> | 0.339 |
| chr11:76114003:D[T]     | chr11:76114003 | c11orf30 | 0.162                | 1.709                             | 2.98x10 <sup>-7</sup> | 0.127 | 1.791                | 1.51x10 <sup>-3</sup> | 0.162 |
| rs12420744[G]           | chr11:76114021 | c11orf30 | 0.159                | 1.719                             | 2.50x10 <sup>-7</sup> | 0.128 | 1.781                | 1.39x10 <sup>-3</sup> | 0.163 |
| rs1893870[T]            | chr11:76117879 | c11orf30 | 0.258                | 1.532                             | 1.52x10 <sup>-5</sup> | 0.106 | 1.510                | 6.82x10 <sup>-3</sup> | 0.137 |
| rs7927830[A]            | chr11:76120315 | c11orf30 | 0.240                | 1.535                             | 1.78x10 <sup>-5</sup> | 0.109 | 1.596                | 4.47x10 <sup>-3</sup> | 0.140 |
| rs2156708[C]            | chr11:76122213 | c11orf30 | 0.241                | 1.534                             | 1.83x10 <sup>-5</sup> | 0.109 | 1.595                | 4.58x10 <sup>-3</sup> | 0.140 |
| rs871911[G]             | chr11:76123849 | c11orf30 | 0.235                | 1.520                             | 2.27x10 <sup>-5</sup> | 0.111 | 1.595                | 5.04x10 <sup>-3</sup> | 0.142 |
| rs59382353[A]           | chr11:76137243 | c11orf30 | 0.157                | 1.753                             | 1.37x10 <sup>-7</sup> | 0.128 | 1.854                | 1.80x10 <sup>-4</sup> | 0.160 |
| rs73004436[G]           | chr11:76144139 | c11orf30 | 0.157                | 1.747                             | 1.44x10 <sup>-7</sup> | 0.128 | 1.852                | 1.68x10 <sup>-4</sup> | 0.160 |
| rs4426156[G]            | chr11:76149594 | c11orf30 | 0.157                | 1.745                             | 1.54x10 <sup>-7</sup> | 0.128 | 1.850                | 1.70x10 <sup>-4</sup> | 0.160 |
| rs61894509[C]           | chr11:76171935 | c11orf30 | 0.158                | 1.733                             | 2.12x10 <sup>-7</sup> | 0.128 | 1.823                | 3.58x10 <sup>-4</sup> | 0.160 |
| rs61696910[G]           | chr11:76190383 | c11orf30 | 0.157                | 1.725                             | 2.96x10 <sup>-7</sup> | 0.128 | 1.815                | 2.98x10 <sup>-4</sup> | 0.160 |
| rs61894530[A]           | chr11:76192036 | c11orf30 | 0.157                | 1.725                             | 2.96x10 <sup>-7</sup> | 0.128 | 1.815                | 2.98x10 <sup>-4</sup> | 0.160 |
| rs11532107[T]           | chr11:76194993 | c11orf30 | 0.157                | 1.725                             | 2.96x10 <sup>-7</sup> | 0.128 | 1.815                | 2.98x10 <sup>-4</sup> | 0.160 |
| rs142931944[G]          | chr11:76196566 | c11orf30 | 0.157                | 1.725                             | 2.96x10 <sup>-7</sup> | 0.128 | 1.815                | 2.98x10 <sup>-4</sup> | 0.160 |
| rs11236766[A]           | chr11:76208451 | c11orf30 | 0.157                | 1.721                             | 2.90x10 <sup>-7</sup> | 0.128 | 1.813                | 2.99x10 <sup>-4</sup> | 0.160 |
| rs61894534[T]           | chr11:76210929 | c11orf30 | 0.157                | 1.721                             | 2.89x10 <sup>-7</sup> | 0.128 | 1.813                | 2.98x10 <sup>-4</sup> | 0.160 |
| rs11236767[A]           | chr11:76211421 | c11orf30 | 0.157                | 1.721                             | 2.89x10 <sup>-7</sup> | 0.128 | 1.813                | 2.98x10 <sup>-4</sup> | 0.160 |
| rs57790584[C]           | chr11:76212164 | c11orf30 | 0.157                | 1.721                             | 2.89x10 <sup>-7</sup> | 0.128 | 1.813                | 2.98x10 <sup>-4</sup> | 0.160 |
| rs7940373[T]            | chr11:76216873 | c11orf30 | 0.157                | 1.721                             | 2.89x10 <sup>-7</sup> | 0.128 | 1.813                | 2.98x10 <sup>-4</sup> | 0.160 |
| rs61894541[G]           | chr11:76231227 | c11orf30 | 0.157                | 1.728                             | 2.14x10 <sup>-7</sup> | 0.128 | 1.808                | 3.23x10 <sup>-4</sup> | 0.160 |
| <b>rs1939469[G]</b>     | chr11:76236220 | c11orf30 | 0.157                | 1.727                             | 2.23x10 <sup>-7</sup> | 0.128 | 1.807                | 3.26x10 <sup>-4</sup> | 0.160 |
| rs11236775[A]           | chr11:76239148 | c11orf30 | 0.157                | 1.717                             | 3.11x10 <sup>-7</sup> | 0.128 | 1.810                | 3.08x10 <sup>-4</sup> | 0.160 |
| rs61894547[T]           | chr11:76248630 | c11orf30 | 0.043                | 2.202                             | 3.20x10 <sup>-6</sup> | 0.237 | 2.288                | 3.27x10 <sup>-3</sup> | 0.301 |
| chr11:76251777:D[T]     | chr11:76251777 | c11orf30 | 0.157                | 1.718                             | 2.95x10 <sup>-7</sup> | 0.128 | 1.809                | 2.84x10 <sup>-4</sup> | 0.160 |
| rs3758716[T]            | chr11:76254529 | c11orf30 | 0.158                | 1.717                             | 3.05x10 <sup>-7</sup> | 0.128 | 1.809                | 2.83x10 <sup>-4</sup> | 0.160 |
| rs3758715[T]            | chr11:76254539 | c11orf30 | 0.158                | 1.717                             | 3.05x10 <sup>-7</sup> | 0.128 | 1.809                | 2.83x10 <sup>-4</sup> | 0.160 |



|                    |                |          |       |       |                       |       |       |                       |       |
|--------------------|----------------|----------|-------|-------|-----------------------|-------|-------|-----------------------|-------|
| rs17134961[C]      | chr11:76257759 | c11orf30 | 0.157 | 1.729 | 1.97x10 <sup>-7</sup> | 0.128 | 1.779 | 5.56x10 <sup>-4</sup> | 0.161 |
| rs2155221[T]       | chr11:76266267 | c11orf30 | 0.158 | 1.721 | 2.37x10 <sup>-7</sup> | 0.128 | 1.777 | 5.46x10 <sup>-4</sup> | 0.161 |
| rs55646091[A]      | chr11:76299431 | c11orf30 | 0.044 | 2.138 | 9.32x10 <sup>-7</sup> | 0.240 | 2.344 | 1.97x10 <sup>-3</sup> | 0.299 |
| <b>rs167769[T]</b> | chr12:57503775 | STAT6    | 0.377 | 1.455 | 7.72x10 <sup>-5</sup> | 0.096 | 1.680 | 0.01                  | 0.154 |
| rs73120411[T]      | chr12:57519826 | STAT6    | 0.346 | 1.469 | 4.02x10 <sup>-5</sup> | 0.101 | 1.669 | 5.37x10 <sup>-3</sup> | 0.163 |

**Supplementary Table 3: P-values following conditional analysis on rs55646091 and rs11236791 in the discovery cohort.** Variants that show significant increase in P-value following the conditional analyses are highlighted in bold and shaded. P values were generated using a missing data likelihood score test as implemented in SNPTEST2.

| c11orf30             |          |         | Discovery  | Conditional analyses |                      |
|----------------------|----------|---------|------------|----------------------|----------------------|
| chromosome           | pos      | all_maf | Pval       | Pval-cond-rs55646091 | Pval-cond-rs11236791 |
| rs55684690[T]        | 76057946 | 0.028   | 4.23X10-8  | <b>0.0402196</b>     | 3.56E-10             |
| rs61894547[T]        | 76248630 | 0.032   | 2.01X10-9  | <b>0.425467</b>      | 1.81X10-9            |
| rs2212434[T]         | 76281593 | 0.413   | 9.14X10-7  | 2.31X10-8            | <b>0.636761</b>      |
| rs61893460[A]        | 76291154 | 0.418   | 1.26X10-6  | 3.36X10-8            | <b>0.186305</b>      |
| rs7126418[T]         | 76292573 | 0.419   | 1.27X10-6  | 5.43X10-8            | <b>0.0682383</b>     |
| rs7110818[T]         | 76292575 | 0.419   | 1.27X10-6  | 5.43X10-8            | <b>0.0682379</b>     |
| rs7114362[T]         | 76293070 | 0.455   | 3.73X10-5  | 1.37X10-7            | <b>0.769806</b>      |
| rs7936070[T]         | 76293527 | 0.409   | 4.07X10-6  | 5.93X10-6            | <b>0.873197</b>      |
| rs7936312[T]         | 76293726 | 0.461   | 7.15X10-6  | 9.65X10-7            | <b>0.218637</b>      |
| rs7936323[A]         | 76293758 | 0.449   | 3.68X10-6  | 2.25X10-7            | <b>0.373308</b>      |
| rs4494327[T]         | 76294836 | 0.480   | 2.79X10-6  | <b>0.00945432</b>    | 6.83X10-4            |
| rs11236791[A]        | 76295598 | 0.406   | 1.60X10-6  | 1.90X10-9            | <b>0.999358</b>      |
| rs10160518[G]        | 76296671 | 0.466   | 2.21X10-6  | <b>0.0403663</b>     | 3.79X10-5            |
| chr11:76298625:I[GT] | 76298625 | 0.405   | 1.56X10-6  | 1.22X10-9            | <b>0.395477</b>      |
| rs2155219[T]         | 76299194 | 0.467   | 1.30X10-6  | <b>0.0242987</b>     | 1.28X10-4            |
| rs55646091[A]        | 76299431 | 0.033   | 5.38X10-10 | <b>0.999701</b>      | 2.19X10-9            |
| rs11236797[A]        | 76299649 | 0.407   | 1.58X10-6  | 2.51X10-9            | <b>0.81221</b>       |
| chr11:76299844:D[C]  | 76299844 | 0.469   | 1.52X10-6  | <b>0.0277185</b>     | 1.33X10-4            |
| rs7930763[A]         | 76302073 | 0.466   | 1.65X10-6  | <b>0.0294863</b>     | 1.28X10-4            |

**Supplementary Table 4: Transcriptome sequencing of genes under the GWAS peaks from eosophageal epithelium of EoE cases and controls.** FPKM, Fragments Per Kilobase of transcript per Million mapped reads. *P* values calculated from a negative binomial model estimated from data to obtain variance estimates. **Log2 fold change**, change in the expression level between cases and controls.

| Gene          | Chr | FPKM case | FPKM control | Log2 (fold change) | Pval                        |
|---------------|-----|-----------|--------------|--------------------|-----------------------------|
| <b>CAPN14</b> | 2   | 9.828     | 0.631        | 3.962              | <b>5.00x10<sup>-5</sup></b> |
| GALNT14       | 2   | 14.391    | 13.102       | 0.135              | 0.604                       |
| TSLP          | 5   | 2.232     | 1.755        | 0.347              | 0.525                       |
| WDR36         | 5   | 7.398     | 8.403        | -0.184             | 0.439                       |
| c110f30       | 11  | 1.790     | 1.926        | -0.106             | 0.860                       |
| LRRC32        | 11  | 0.125     | 0.040        | 1.6391             | 1                           |
| STAT6         | 12  | 48.3      | 45.6         | 0.08               | 0.737                       |
| ANKRD27       | 19  | 12.38     | 12.23        | 0.018              | 0.939                       |
| NOVA1         | 14  | 0.58      | 0.94         | -0.698             | 0.610                       |

**Supplementary Table 5: Pathway analysis of differentially expressed genes from the transcriptome sequencing of EoE and control esophageal epithelial cells.** Direction: indicates whether the term was enriched in genes whose expression was increased in cases vs controls (↑) or decreased in cases vs controls (↓). Category: GOTERM is a GO Biological process terms and SP\_PIR refers to Protein Information Resource (PIR) Keywords. Gene count: number of genes in the differentially expressed list that mapped to the term. Benjamini: FDR corrected P-value. P values derived from a Fisher-exact test of the target gene list compared to the genome background

| Direction | Category        | Term                                                         | Gene count | P-value                 | Benjamini             |
|-----------|-----------------|--------------------------------------------------------------|------------|-------------------------|-----------------------|
| ↑         | GOTERM_BP_FAT   | <a href="#">epidermis development</a>                        | 23         | 9.80x10 <sup>-12</sup>  | 1.50X10 <sup>-8</sup> |
| ↑         | GOTERM_BP_FAT   | <a href="#">ectoderm development</a>                         | 23         | 4.70x10 <sup>-11</sup>  | 3.60X10 <sup>-8</sup> |
| ↑         | SP_PIR_KEYWORDS | <a href="#">glycoprotein</a>                                 | 126        | 3.10x10 <sup>-10</sup>  | 1.20X10 <sup>-7</sup> |
| ↑         | SP_PIR_KEYWORDS | <a href="#">signal</a>                                       | 103        | 4.10 x10 <sup>-10</sup> | 7.60X10 <sup>-8</sup> |
| ↑         | GOTERM_BP_FAT   | <a href="#">epithelial cell differentiation</a>              | 16         | 7.10X10 <sup>-8</sup>   | 3.60X10 <sup>-5</sup> |
| ↑         | SP_PIR_KEYWORDS | <a href="#">protease inhibitor</a>                           | 13         | 3.50X10 <sup>-7</sup>   | 4.30X10 <sup>-5</sup> |
| ↑         | GOTERM_BP_FAT   | <a href="#">epidermal cell differentiation</a>               | 11         | 1.20X10 <sup>-6</sup>   | 4.80X10 <sup>-4</sup> |
| ↑         | SP_PIR_KEYWORDS | <a href="#">Serine protease inhibitor</a>                    | 11         | 1.20X10 <sup>-6</sup>   | 1.10X10 <sup>-4</sup> |
| ↑         | GOTERM_MF_FAT   | <a href="#">serine-type endopeptidase inhibitor activity</a> | 12         | 1.30X10 <sup>-6</sup>   | 6.00X10 <sup>-4</sup> |
| ↑         | GOTERM_BP_FAT   | <a href="#">epithelium development</a>                       | 18         | 2.30X10 <sup>-6</sup>   | 6.90X10 <sup>-4</sup> |
| ↑         | GOTERM_CC_FAT   | <a href="#">cornified envelope</a>                           | 7          | 2.70X10 <sup>-6</sup>   | 7.00X10 <sup>-4</sup> |
| ↑         | GOTERM_MF_FAT   | <a href="#">endopeptidase inhibitor activity</a>             | 14         | 3.70X10 <sup>-6</sup>   | 8.90X10 <sup>-4</sup> |
| ↑         | GOTERM_BP_FAT   | <a href="#">keratinocyte differentiation</a>                 | 10         | 5.00X10 <sup>-6</sup>   | 1.30X10 <sup>-3</sup> |
| ↑         | GOTERM_MF_FAT   | <a href="#">peptidase inhibitor activity</a>                 | 14         | 6.70X10 <sup>-6</sup>   | 1.10X10 <sup>-3</sup> |
| ↑         | GOTERM_BP_FAT   | <a href="#">peptide cross-linking</a>                        | 7          | 8.70X10 <sup>-6</sup>   | 1.90X10 <sup>-3</sup> |
| ↑         | SP_PIR_KEYWORDS | <a href="#">Secreted</a>                                     | 54         | 1.70X10 <sup>-5</sup>   | 1.30X10 <sup>-3</sup> |
| ↑         | SP_PIR_KEYWORDS | <a href="#">polymorphism</a>                                 | 238        | 1.80X10 <sup>-5</sup>   | 1.10X10 <sup>-3</sup> |

|   |                 |                                                    |     |                         |                         |
|---|-----------------|----------------------------------------------------|-----|-------------------------|-------------------------|
| ↑ | GOTERM_CC_FAT   | <a href="#">apical plasma membrane</a>             | 12  | 4.90X10 <sup>-5</sup>   | 6.50X10 <sup>-3</sup>   |
| ↑ | GOTERM_MF_FAT   | <a href="#">enzyme inhibitor activity</a>          | 17  | 5.70X10 <sup>-5</sup>   | 6.90X10 <sup>-3</sup>   |
| ↑ | SP_PIR_KEYWORDS | <a href="#">disulfide bond</a>                     | 78  | 8.80X10 <sup>-5</sup>   | 4.60X10 <sup>-3</sup>   |
| ↑ | SP_PIR_KEYWORDS | <a href="#">Ichthyosis</a>                         | 6   | 1.50X10 <sup>-4</sup>   | 7.00X10 <sup>-3</sup>   |
| ↑ | GOTERM_CC_FAT   | <a href="#">apical part of cell</a>                | 13  | 1.70X10 <sup>-4</sup>   | 1.50X10 <sup>-2</sup>   |
| ↑ | GOTERM_CC_FAT   | <a href="#">extracellular region</a>               | 61  | 2.20X10 <sup>-4</sup>   | 1.40X10 <sup>-2</sup>   |
| ↑ | GOTERM_MF_FAT   | <a href="#">protein binding, bridging</a>          | 9   | 4.10X10 <sup>-4</sup>   | 3.80X10 <sup>-2</sup>   |
| ↑ | GOTERM_MF_FAT   | <a href="#">structural molecule activity</a>       | 26  | 4.30X10 <sup>-4</sup>   | 3.40X10 <sup>-2</sup>   |
| ↑ | GOTERM_CC_FAT   | <a href="#">plasma membrane part</a>               | 64  | 4.80X10 <sup>-4</sup>   | 2.50X10 <sup>-2</sup>   |
| ↑ | SP_PIR_KEYWORDS | <a href="#">keratinization</a>                     | 6   | 6.10X10 <sup>-4</sup>   | 2.50X10 <sup>-2</sup>   |
| ↑ | GOTERM_MF_FAT   | <a href="#">serine-type endopeptidase activity</a> | 11  | 7.00X10 <sup>-4</sup>   | 4.70X10 <sup>-2</sup>   |
| ↑ | SP_PIR_KEYWORDS | <a href="#">ectodermal dysplasia</a>               | 5   | 7.20X10 <sup>-4</sup>   | 2.60X10 <sup>-2</sup>   |
| ↑ | SP_PIR_KEYWORDS | <a href="#">membrane</a>                           | 137 | 9.20X10 <sup>-4</sup>   | 3.00X10 <sup>-2</sup>   |
| ↑ | GOTERM_CC_FAT   | <a href="#">plasma membrane</a>                    | 96  | 1.10X10 <sup>-3</sup>   | 4.80X10 <sup>-2</sup>   |
| ↑ | SP_PIR_KEYWORDS | <a href="#">cell adhesion</a>                      | 18  | 1.20X10 <sup>-3</sup>   | 3.60X10 <sup>-2</sup>   |
| ↑ | SP_PIR_KEYWORDS | <a href="#">disease mutation</a>                   | 45  | 1.40X10 <sup>-3</sup>   | 4.00X10 <sup>-2</sup>   |
| ↑ | SP_PIR_KEYWORDS | <a href="#">calcium</a>                            | 27  | 1.80X10 <sup>-3</sup>   | 4.60X10 <sup>-2</sup>   |
| ↓ | GOTERM_BP_FAT   | <a href="#">M phase</a>                            | 34  | 2.30 x10 <sup>-26</sup> | 2.80 x10 <sup>-23</sup> |
| ↓ | GOTERM_BP_FAT   | <a href="#">cell cycle phase</a>                   | 36  | 1.90 x10 <sup>-25</sup> | 1.10 x10 <sup>-22</sup> |
| ↓ | GOTERM_BP_FAT   | <a href="#">nuclear division</a>                   | 29  | 3.10 x10 <sup>-25</sup> | 1.20 x10 <sup>-22</sup> |
| ↓ | GOTERM_BP_FAT   | <a href="#">mitosis</a>                            | 29  | 3.10 x10 <sup>-25</sup> | 1.20 x10 <sup>-22</sup> |
| ↓ | GOTERM_BP_FAT   | <a href="#">M phase of mitotic cell cycle</a>      | 29  | 5.10 x10 <sup>-25</sup> | 1.50 x10 <sup>-22</sup> |
| ↓ | GOTERM_BP_FAT   | <a href="#">organelle fission</a>                  | 29  | 9.60 x10 <sup>-25</sup> | 2.30 x10 <sup>-22</sup> |
| ↓ | GOTERM_BP_FAT   | <a href="#">mitotic cell cycle</a>                 | 34  | 1.00 x10 <sup>-24</sup> | 2.10 x10 <sup>-22</sup> |
| ↓ | SP_PIR_KEYWORDS | <a href="#">mitosis</a>                            | 25  | 1.10 x10 <sup>-23</sup> | 2.40 x10 <sup>-21</sup> |
| ↓ | GOTERM_BP_FAT   | <a href="#">cell cycle process</a>                 | 37  | 5.40 x10 <sup>-22</sup> | 9.20 x10 <sup>-20</sup> |

|   |                 |                                                          |    |                         |                         |
|---|-----------------|----------------------------------------------------------|----|-------------------------|-------------------------|
| ↓ | SP_PIR_KEYWORDS | <a href="#">cell cycle</a>                               | 32 | 1.30 x10 <sup>-21</sup> | 1.50 x10 <sup>-19</sup> |
| ↓ | SP_PIR_KEYWORDS | <a href="#">cell division</a>                            | 26 | 4.20 x10 <sup>-21</sup> | 3.10 x10 <sup>-19</sup> |
| ↓ | GOTERM_BP_FAT   | <a href="#">cell cycle</a>                               | 40 | 3.30 x10 <sup>-20</sup> | 4.90 x10 <sup>-18</sup> |
| ↓ | GOTERM_CC_FAT   | <a href="#">spindle</a>                                  | 21 | 6.30 x10 <sup>-19</sup> | 1.10 x10 <sup>-16</sup> |
| ↓ | GOTERM_BP_FAT   | <a href="#">cell division</a>                            | 24 | 5.40 x10 <sup>-16</sup> | 7.40 x10 <sup>-14</sup> |
| ↓ | GOTERM_CC_FAT   | <a href="#">microtubule cytoskeleton</a>                 | 29 | 8.50 x10 <sup>-15</sup> | 7.50 x10 <sup>-13</sup> |
| ↓ | GOTERM_CC_FAT   | <a href="#">chromosome, centromeric region</a>           | 16 | 1.30 x10 <sup>-13</sup> | 7.50 x10 <sup>-12</sup> |
| ↓ | GOTERM_CC_FAT   | <a href="#">cytoskeletal part</a>                        | 34 | 1.30 x10 <sup>-12</sup> | 5.60 x10 <sup>-11</sup> |
| ↓ | GOTERM_CC_FAT   | <a href="#">condensed chromosome, centromeric region</a> | 12 | 7.50 x10 <sup>-12</sup> | 2.70 x10 <sup>-10</sup> |
| ↓ | GOTERM_BP_FAT   | <a href="#">microtubule-based process</a>                | 18 | 5.50 x10 <sup>-11</sup> | 6.60X10 <sup>-9</sup>   |
| ↓ | GOTERM_CC_FAT   | <a href="#">condensed chromosome</a>                     | 14 | 6.30 x10 <sup>-11</sup> | 1.90X10 <sup>-9</sup>   |
| ↓ | GOTERM_BP_FAT   | <a href="#">chromosome segregation</a>                   | 12 | 9.20 x10 <sup>-11</sup> | 1.00X10 <sup>-8</sup>   |
| ↓ | SP_PIR_KEYWORDS | <a href="#">cytoskeleton</a>                             | 24 | 1.50 x10 <sup>-10</sup> | 8.70X10 <sup>-9</sup>   |
| ↓ | SP_PIR_KEYWORDS | <a href="#">centromere</a>                               | 9  | 2.30 x10 <sup>-10</sup> | 1.10X10 <sup>-8</sup>   |
| ↓ | SP_PIR_KEYWORDS | <a href="#">kinetochore</a>                              | 10 | 6.60 x10 <sup>-10</sup> | 2.50X10 <sup>-8</sup>   |
| ↓ | GOTERM_CC_FAT   | <a href="#">condensed chromosome kinetochore</a>         | 10 | 1.30X10 <sup>-9</sup>   | 3.30X10 <sup>-8</sup>   |
| ↓ | GOTERM_CC_FAT   | <a href="#">cytoskeleton</a>                             | 36 | 1.40X10 <sup>-9</sup>   | 3.20X10 <sup>-8</sup>   |
| ↓ | GOTERM_CC_FAT   | <a href="#">kinetochore</a>                              | 10 | 1.70X10 <sup>-8</sup>   | 3.40X10 <sup>-7</sup>   |
| ↓ | GOTERM_BP_FAT   | <a href="#">regulation of cell cycle</a>                 | 17 | 2.50X10 <sup>-8</sup>   | 2.50X10 <sup>-6</sup>   |
| ↓ | SP_PIR_KEYWORDS | <a href="#">phosphoprotein</a>                           | 85 | 2.90X10 <sup>-8</sup>   | 9.40X10 <sup>-7</sup>   |
| ↓ | GOTERM_BP_FAT   | <a href="#">spindle organization</a>                     | 8  | 1.00X10 <sup>-7</sup>   | 9.60X10 <sup>-6</sup>   |
| ↓ | GOTERM_CC_FAT   | <a href="#">chromosomal part</a>                         | 17 | 1.60X10 <sup>-7</sup>   | 2.90X10 <sup>-6</sup>   |
| ↓ | GOTERM_CC_FAT   | <a href="#">chromosome</a>                               | 18 | 3.30X10 <sup>-7</sup>   | 5.30X10 <sup>-6</sup>   |

|   |                 |                                                              |    |                       |                       |
|---|-----------------|--------------------------------------------------------------|----|-----------------------|-----------------------|
| ↓ | GOTERM_BP_FAT   | <a href="#">microtubule cytoskeleton organization</a>        | 11 | 5.60X10 <sup>-7</sup> | 4.80X10 <sup>-5</sup> |
| ↓ | GOTERM_BP_FAT   | <a href="#">regulation of mitotic cell cycle</a>             | 11 | 7.60X10 <sup>-7</sup> | 6.10X10 <sup>-5</sup> |
| ↓ | GOTERM_BP_FAT   | <a href="#">cytoskeleton organization</a>                    | 17 | 1.00X10 <sup>-6</sup> | 7.80X10 <sup>-5</sup> |
| ↓ | GOTERM_CC_FAT   | <a href="#">non-membrane-bounded organelle</a>               | 45 | 1.20X10 <sup>-6</sup> | 1.80X10 <sup>-5</sup> |
| ↓ | GOTERM_CC_FAT   | <a href="#">intracellular non-membrane-bounded organelle</a> | 45 | 1.20X10 <sup>-6</sup> | 1.80X10 <sup>-5</sup> |
| ↓ | GOTERM_BP_FAT   | <a href="#">organelle localization</a>                       | 9  | 1.30X10 <sup>-6</sup> | 8.80X10 <sup>-5</sup> |
| ↓ | SP_PIR_KEYWORDS | <a href="#">cytoplasm</a>                                    | 48 | 1.50X10 <sup>-6</sup> | 4.10X10 <sup>-5</sup> |
| ↓ | GOTERM_BP_FAT   | <a href="#">mitotic cell cycle checkpoint</a>                | 7  | 1.70X10 <sup>-6</sup> | 1.20X10 <sup>-4</sup> |
| ↓ | GOTERM_MF_FAT   | <a href="#">microtubule motor activity</a>                   | 8  | 2.30X10 <sup>-6</sup> | 6.10X10 <sup>-4</sup> |
| ↓ | GOTERM_BP_FAT   | <a href="#">spindle checkpoint</a>                           | 5  | 2.50X10 <sup>-6</sup> | 1.60X10 <sup>-4</sup> |
| ↓ | GOTERM_CC_FAT   | <a href="#">microtubule</a>                                  | 13 | 3.70X10 <sup>-6</sup> | 5.00X10 <sup>-5</sup> |
| ↓ | GOTERM_CC_FAT   | <a href="#">spindle microtubule</a>                          | 6  | 4.10X10 <sup>-6</sup> | 5.30X10 <sup>-5</sup> |
| ↓ | GOTERM_BP_FAT   | <a href="#">microtubule-based movement</a>                   | 9  | 5.90X10 <sup>-6</sup> | 3.50X10 <sup>-4</sup> |
| ↓ | GOTERM_BP_FAT   | <a href="#">regulation of cell cycle process</a>             | 9  | 6.30X10 <sup>-6</sup> | 3.60X10 <sup>-4</sup> |
| ↓ | SP_PIR_KEYWORDS | <a href="#">microtubule</a>                                  | 11 | 6.60X10 <sup>-6</sup> | 1.70X10 <sup>-4</sup> |
| ↓ | GOTERM_BP_FAT   | <a href="#">establishment of chromosome localization</a>     | 5  | 6.70X10 <sup>-6</sup> | 3.70X10 <sup>-4</sup> |
| ↓ | GOTERM_BP_FAT   | <a href="#">chromosome localization</a>                      | 5  | 6.70X10 <sup>-6</sup> | 3.70X10 <sup>-4</sup> |
| ↓ | GOTERM_CC_FAT   | <a href="#">spindle pole</a>                                 | 6  | 9.40X10 <sup>-6</sup> | 1.10X10 <sup>-4</sup> |
| ↓ | GOTERM_BP_FAT   | <a href="#">cell cycle checkpoint</a>                        | 8  | 1.30X10 <sup>-5</sup> | 7.00X10 <sup>-4</sup> |

|   |                 |                                                                              |    |                       |                       |
|---|-----------------|------------------------------------------------------------------------------|----|-----------------------|-----------------------|
| ↓ | GOTERM_CC_FAT   | <a href="#">midbody</a>                                                      | 5  | 1.40X10 <sup>-5</sup> | 1.60X10 <sup>-4</sup> |
| ↓ | GOTERM_BP_FAT   | <a href="#">mitotic sister chromatid segregation</a>                         | 6  | 1.40X10 <sup>-5</sup> | 6.80X10 <sup>-4</sup> |
| ↓ | GOTERM_BP_FAT   | <a href="#">sister chromatid segregation</a>                                 | 6  | 1.60X10 <sup>-5</sup> | 7.40X10 <sup>-4</sup> |
| ↓ | GOTERM_BP_FAT   | <a href="#">establishment of organelle localization</a>                      | 7  | 2.80X10 <sup>-5</sup> | 1.30X10 <sup>-3</sup> |
| ↓ | GOTERM_BP_FAT   | <a href="#">regulation of mitotic metaphase/anaphase transition</a>          | 5  | 3.40X10 <sup>-5</sup> | 1.50X10 <sup>-3</sup> |
| ↓ | SP_PIR_KEYWORDS | <a href="#">motor protein</a>                                                | 8  | 4.70X10 <sup>-5</sup> | 1.10X10 <sup>-3</sup> |
| ↓ | GOTERM_CC_FAT   | <a href="#">outer kinetochore of condensed chromosome</a>                    | 4  | 4.90X10 <sup>-5</sup> | 5.10X10 <sup>-4</sup> |
| ↓ | GOTERM_CC_FAT   | <a href="#">microtubule organizing center</a>                                | 11 | 5.90X10 <sup>-5</sup> | 5.80X10 <sup>-4</sup> |
| ↓ | SP_PIR_KEYWORDS | <a href="#">Chromosome partition</a>                                         | 5  | 6.90X10 <sup>-5</sup> | 1.40X10 <sup>-3</sup> |
| ↓ | SP_PIR_KEYWORDS | <a href="#">chromosomal protein</a>                                          | 8  | 8.50X10 <sup>-5</sup> | 1.60X10 <sup>-3</sup> |
| ↓ | SP_PIR_KEYWORDS | <a href="#">ubl conjugation</a>                                              | 15 | 8.70X10 <sup>-5</sup> | 1.50X10 <sup>-3</sup> |
| ↓ | GOTERM_BP_FAT   | <a href="#">negative regulation of mitotic metaphase/anaphase transition</a> | 4  | 9.90X10 <sup>-5</sup> | 4.20X10 <sup>-3</sup> |
| ↓ | GOTERM_BP_FAT   | <a href="#">mitotic cell cycle spindle assembly checkpoint</a>               | 4  | 9.90X10 <sup>-5</sup> | 4.20X10 <sup>-3</sup> |
| ↓ | GOTERM_BP_FAT   | <a href="#">cell proliferation</a>                                           | 14 | 1.00X10 <sup>-4</sup> | 4.10X10 <sup>-3</sup> |
| ↓ | GOTERM_CC_FAT   | <a href="#">centrosome</a>                                                   | 10 | 1.20X10 <sup>-4</sup> | 1.20X10 <sup>-3</sup> |
| ↓ | GOTERM_BP_FAT   | <a href="#">negative regulation of mitosis</a>                               | 4  | 1.30X10 <sup>-4</sup> | 5.20X10 <sup>-3</sup> |

|   |                 |                                                               |     |                       |                       |
|---|-----------------|---------------------------------------------------------------|-----|-----------------------|-----------------------|
| ↓ | GOTERM_BP_FAT   | <a href="#">negative regulation of nuclear division</a>       | 4   | 1.30X10 <sup>-4</sup> | 5.20X10 <sup>-3</sup> |
| ↓ | GOTERM_MF_FAT   | <a href="#">motor activity</a>                                | 8   | 1.30X10 <sup>-4</sup> | 1.70X10 <sup>-2</sup> |
| ↓ | GOTERM_CC_FAT   | <a href="#">chromosome passenger complex</a>                  | 3   | 2.10X10 <sup>-4</sup> | 1.90X10 <sup>-3</sup> |
| ↓ | GOTERM_CC_FAT   | <a href="#">microtubule associated complex</a>                | 7   | 2.30X10 <sup>-4</sup> | 2.00X10 <sup>-3</sup> |
| ↓ | GOTERM_BP_FAT   | <a href="#">mitotic spindle organization</a>                  | 4   | 2.70X10 <sup>-4</sup> | 1.00X10 <sup>-2</sup> |
| ↓ | SP_PIR_KEYWORDS | <a href="#">extracellular matrix</a>                          | 9   | 3.50X10 <sup>-4</sup> | 5.70X10 <sup>-3</sup> |
| ↓ | SP_PIR_KEYWORDS | <a href="#">polymorphism</a>                                  | 103 | 4.30X10 <sup>-4</sup> | 6.50X10 <sup>-3</sup> |
| ↓ | GOTERM_BP_FAT   | <a href="#">negative regulation of organelle organization</a> | 6   | 7.10X10 <sup>-4</sup> | 2.60X10 <sup>-2</sup> |
| ↓ | SP_PIR_KEYWORDS | <a href="#">metalloprotease</a>                               | 7   | 7.80X10 <sup>-4</sup> | 1.10X10 <sup>-2</sup> |
| ↓ | GOTERM_BP_FAT   | <a href="#">phosphoinositide-mediated signaling</a>           | 6   | 9.80X10 <sup>-4</sup> | 3.50X10 <sup>-2</sup> |
| ↓ | GOTERM_BP_FAT   | <a href="#">centromere complex assembly</a>                   | 3   | 1.10X10 <sup>-3</sup> | 3.80X10 <sup>-2</sup> |
| ↓ | SP_PIR_KEYWORDS | <a href="#">heparin-binding</a>                               | 5   | 1.20X10 <sup>-3</sup> | 1.60X10 <sup>-2</sup> |
| ↓ | GOTERM_BP_FAT   | <a href="#">negative regulation of cell cycle process</a>     | 4   | 1.30X10 <sup>-3</sup> | 4.20X10 <sup>-2</sup> |
| ↓ | GOTERM_BP_FAT   | <a href="#">regulation of mitosis</a>                         | 5   | 1.40X10 <sup>-3</sup> | 4.50X10 <sup>-2</sup> |
| ↓ | GOTERM_BP_FAT   | <a href="#">regulation of nuclear division</a>                | 5   | 1.40X10 <sup>-3</sup> | 4.50X10 <sup>-2</sup> |
| ↓ | GOTERM_BP_FAT   | <a href="#">G2 phase of mitotic cell cycle</a>                | 3   | 1.50X10 <sup>-3</sup> | 4.80X10 <sup>-2</sup> |
| ↓ | GOTERM_BP_FAT   | <a href="#">G2 phase</a>                                      | 3   | 1.50X10 <sup>-3</sup> | 4.80X10 <sup>-2</sup> |
